# Supplementary material for: Rbfox1 Is Expressed in the Mouse Brain in the Form of Multiple Transcript Variants and Contains Functional E Boxes in Its Alternative Promoters
Source: PubMed Central journal article supplement (PMC7214753; doi:10.3389/fnmol.2020.00066), 2020-05-05
Supplement: Table_1.pdf [file Table_1.pdf]

Table S1: Primer sequences

| Application          | Primer                        | Sequenz (5'-3')                               | Roche probe |
|----------------------|-------------------------------|-----------------------------------------------|-------------|
| qPCR                 | Rbfox1_F                      | GACCCCTACCACCACACACT                          | 19          |
|                      | Rbfox1_R                      | TCTTGGCATCGGTCAAGG                            |             |
|                      | Rbfox1_alt3end_R              | TGCAGCTTAGCTCCTCTGAAGT                        |             |
|                      | Rbfox1_E1A_F                  | gtggcgaaggcagaagtg                            | 16          |
|                      | Rbfox1_E1A_R                  | caggactcaccaaaacctgac                         |             |
|                      | Rbfox1_E1A.1_F                | cggtgagaaaagtaaccagtgtag                      |             |
|                      | Rbfox1_E1A.1_R                | caaaacctgactctccaccag                         | 68          |
|                      | Rbfox1_E1B_F                  | GTTGCCTCTGGTGGATGCTG                          |             |
|                      | Rbfox1_E1B_R                  | TGAGCTGTTTCTAGAACTCCTG                        |             |
|                      | Rbfox1_E1C.1_F                | CGGATCAGAATCCGACCT                            | 58          |
|                      | Rbfox1_E1C.1_R                | CTTTGATATCCTACCCTGTGTAA                       |             |
|                      | Rbfox1_E1C_F                  | ccaatgcatgtagcaagag                           | 15          |
|                      | Rbfox1_E1C_R                  | gagtgcctttgatctccta                           |             |
|                      | Rbfox1_E1D_F                  | GCCTTGACTTTTATGTACTTACAGCAG                   | 11          |
|                      | Rbfox1_E1D_R                  | ATAAGGCTGAGCCATTGTGTC                         |             |
|                      | Gapdh_F                       | TGCTGAGTATGTCGTGGAGTCT                        | 157         |
| Gapdh_R              | TTGGCTCCACCCTTCAAGT           |                                               |             |
| Bcas2_F              | CAACCGATTGAATTACTCAGCA        | -                                             |             |
| Bcas2_R              | ACACATTCTTGCCATGCAGT          |                                               |             |
| Cloning              | Rbfox1_Prom1B_KpnI_F          | ACTGGGTACCAGACGCCTGGCTCTTGATAA                |             |
|                      | Rbfox1_Prom1B_HindIII_R       | ACTGAAGCTTTCCTCCTGGATTCCCTCAGTT               |             |
|                      | Rbfox1_Prom1C_XhoI_F          | ACTGCTCGAGTACCTCGTGGGGATATGAA                 |             |
|                      | Rbfox1_Prom1C_ext_BglII_R     | ACTGAGATCTCATCTTCTTTGCAAAATCCAG               |             |
|                      | Rbfox1_Prom1D_XhoI_F          | ACTGCTCGAGAGACTGTAGTTTTTTCCAGT                |             |
|                      | Rbfox1_Prom1D_BglII_R         | ACTGAGATCTCCGATTATCTAACTCACACA                |             |
| In vitro mutagenesis | Prom1B_c1658t_a1659t_F        | CAGTGCAAACATATGTAAGCAATTCATGGTAGTGTGACCTGAGTA |             |
|                      | Prom1B_c1658t_a1659t_R        | TACTCAGGTCACACTACCATGAATTGCTTACATAGTTGCACTG   |             |
|                      | Prom1B_c2865t_a2866t_F        | GAGTCGCTCAGCTCGTTTCTGGAGGGGACAGC              |             |
|                      | Prom1B_c2865t_a2866t_R        | GCTGTCCCTCCAGAAACGAGCTGAGCGACTC               |             |
|                      | Prom1B_c2378t_a2379t_F        | CACAGAGAGACACACACATTTCATGCACACATTTTCTCGC      |             |
|                      | Prom1B_c2378t_a2379t_R        | GCGAGAAAAATGTGTGCATGAATGTGTGTGTCTCTCTGTG      |             |
|                      | Prom1B_c2815t_a2816t_c2817t_F | CCAGCCACAGGACCTTTGCGTGCCTCGCCG                |             |
|                      | Prom1B_c2815t_a2816t_c2817t_R | CGCGAGGGCGACGCAAAGGTCCTGTGGCTGG               |             |
|                      | Prom1C_c332t_a333t_F          | CATCAGTTTGTCTACTTTCTTAGTGCTTGGCAAAGGGGT       |             |
|                      | Prom1C_c332t_a333t_R          | ACCCCTTTGCCAAGCACTAAGAAAGTGAGCAAACCTGATG      |             |
|                      | Prom1C_c194t_a195t_F          | CATTGCTCCTGAGTAAAAATGGTTGTTTAGTGAGGACTCTGG    |             |
|                      | Prom1C_c194t_a195t_R          | CCAGAGTCTCACTAAACAACCAATTTTAACTCAGGAGCAATG    |             |
|                      | Prom1C_c236t_a237t_F          | GGGACTGTGCAAGGTGCCCTATTCTGTTTTGTGGTACATATTT   |             |
|                      | Prom1C_c236t_a237t_R          | AAATATGTACCACAAAACAGAATAGGGCACCTTGCACAGTCCC   |             |
|                      | Prom1C_c564t_a565t_F          | TCGCTTGTCAAGGCCTTGAATTCCTGTGGTGGCT            |             |
|                      | Prom1C_c564t_a565t_R          | AGCCACCAGCAGGAATTCGAAGGCCTTGAACAAGCGA         |             |
|                      | Prom1C_c652t_a653t_c654t_F    | TAGAATCATTGGCATTGCTAGTTTGTGGGTACCATTCTCTGCTGC |             |
|                      | Prom1C_c652t_a653t_c654t_R    | GCAGCAGAGAATGGTACCCACAACTAGCAATGCCAATGATTCTA  |             |
|                      | Prom1C_c278t_a279t_c280t_F    | AAGAACAAGGAAGAGATTTGTGCTGGGGGGGGGGT           |             |
|                      | Prom1C_c278t_a279t_c280t_R    | CACCCCCCCCCAGCAGAAATCTCTTCCCTTGTCTTT          |             |
